# Supplementary material for: Equilibrium line altitudes of alpine glaciers suggest summers in Alaska were not more than −2 – −5 °C colder than the pre-Industrial during the Last Glacial Maximum
Source: Copernicus journal article supplement (doi:10.5194/cp-2023-20), 2023-04-12

**1st order**

RMS: 145  
 $\chi^2 = 12465$

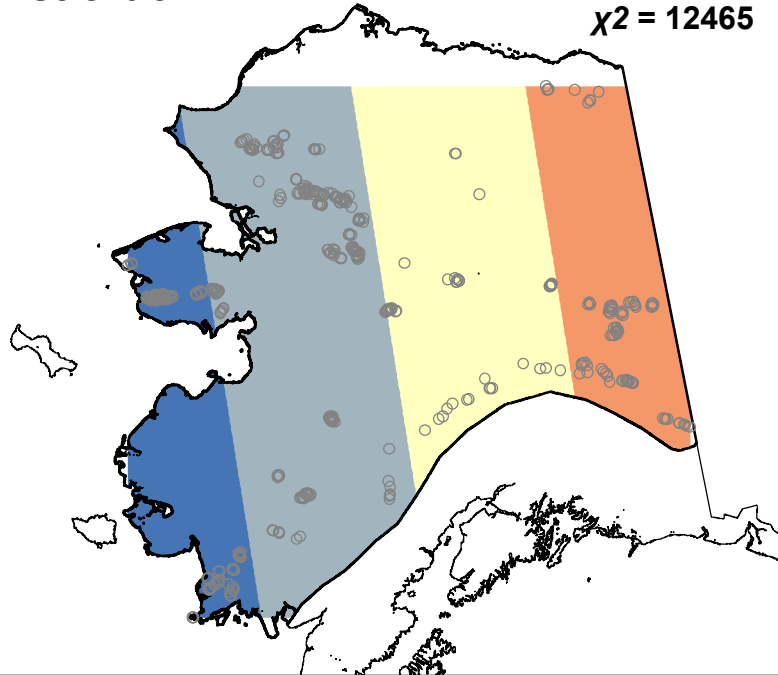

**2nd order**

RMS: 143  
 $\chi^2 = 11824$

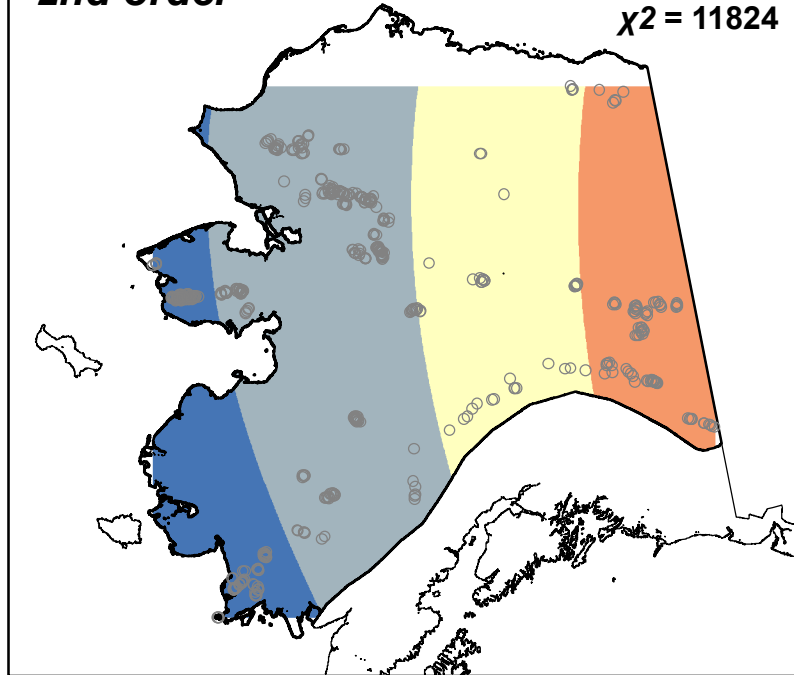

**3rd order**

RMS: 127  
 $\chi^2 = 9150$

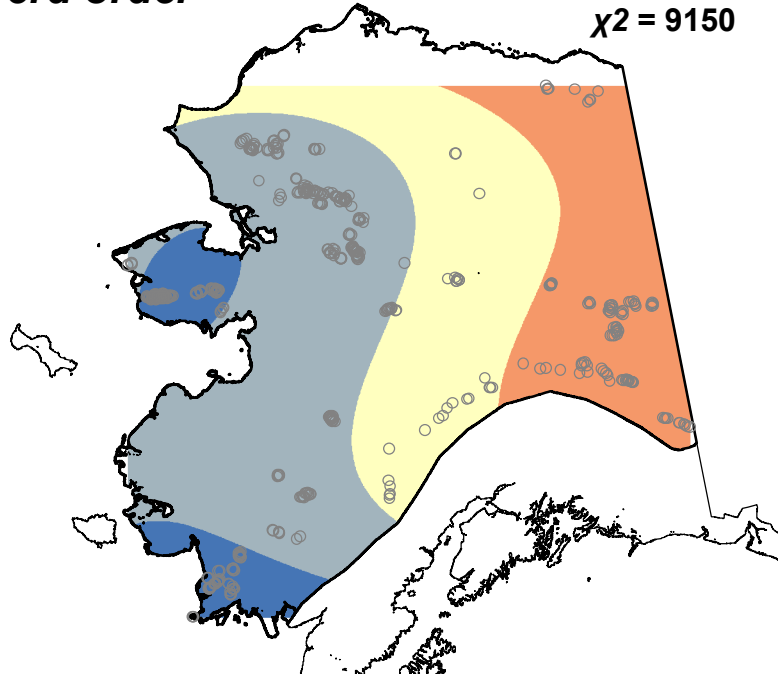

**4th order**

RMS: 119  
 $\chi^2 = 8357$

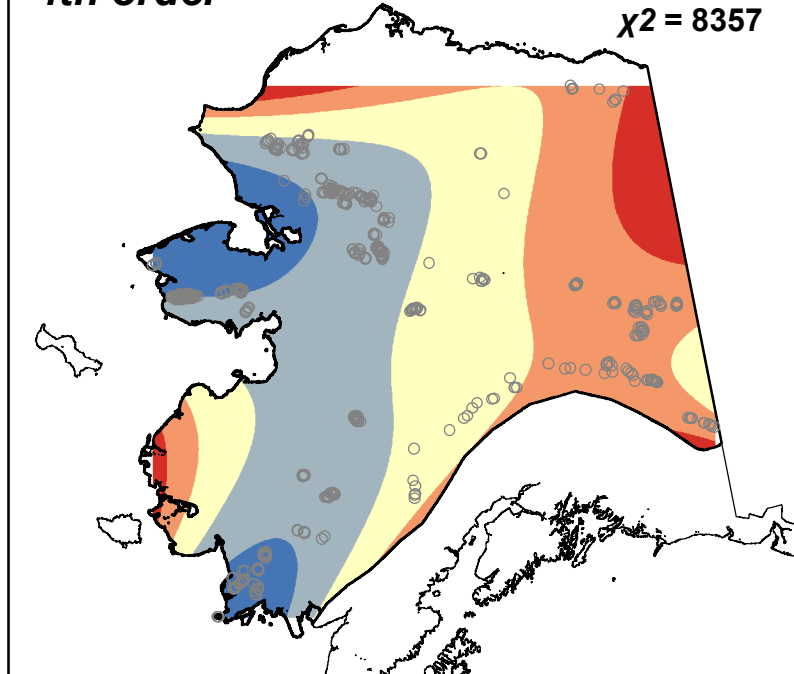

**AAR LGM  
polynomial  
trend  
surfaces**

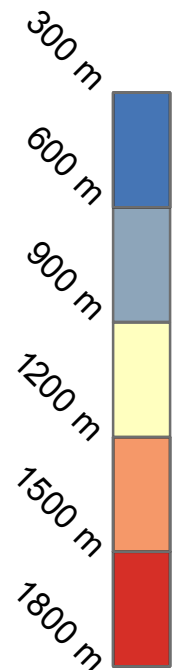

Supplement: Supplementary file 6 [file cp-2023-20-supplement.zip]
