# Supplementary figures and images for: Equilibrium line altitudes of alpine glaciers suggest summers in Alaska were not more than −2 – −5 °C colder than the pre-Industrial during the Last Glacial Maximum
Source: Copernicus journal article supplement (doi:10.5194/cp-2023-20), 2023-04-12

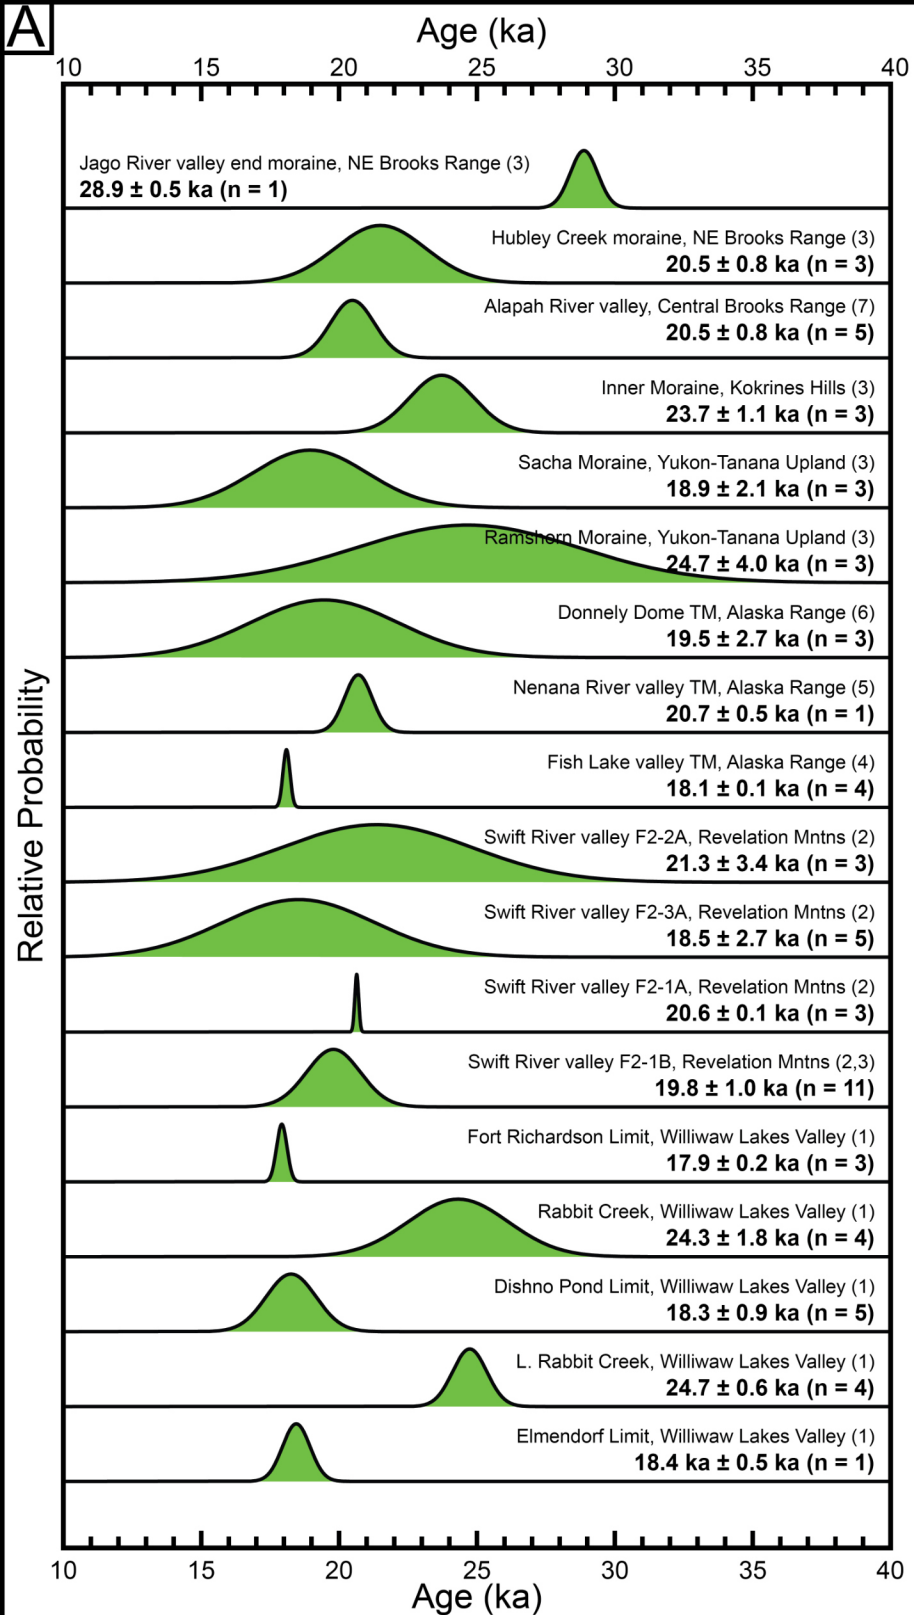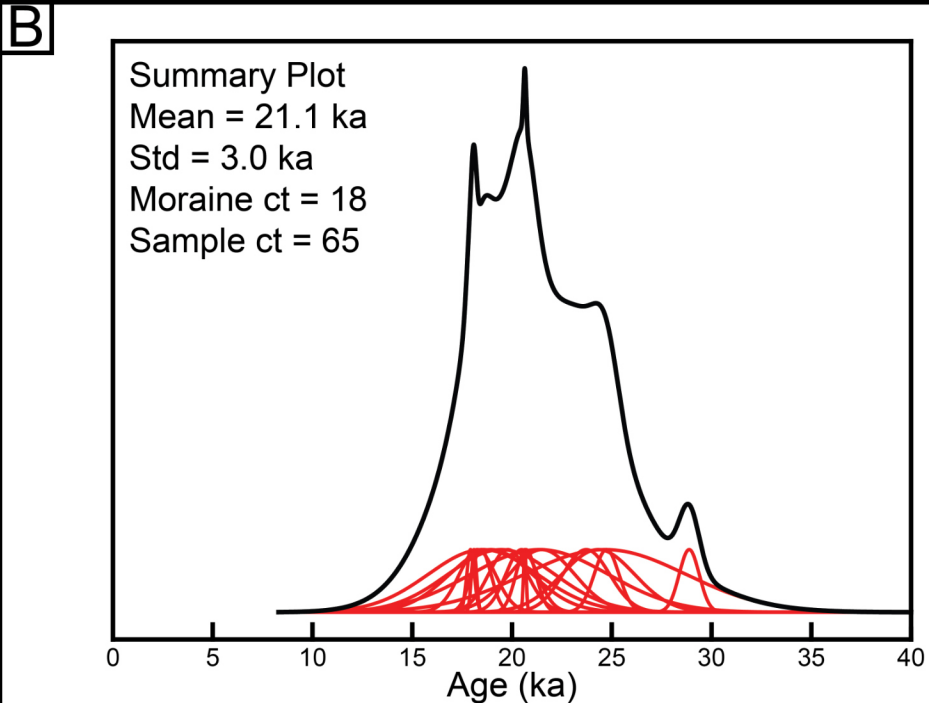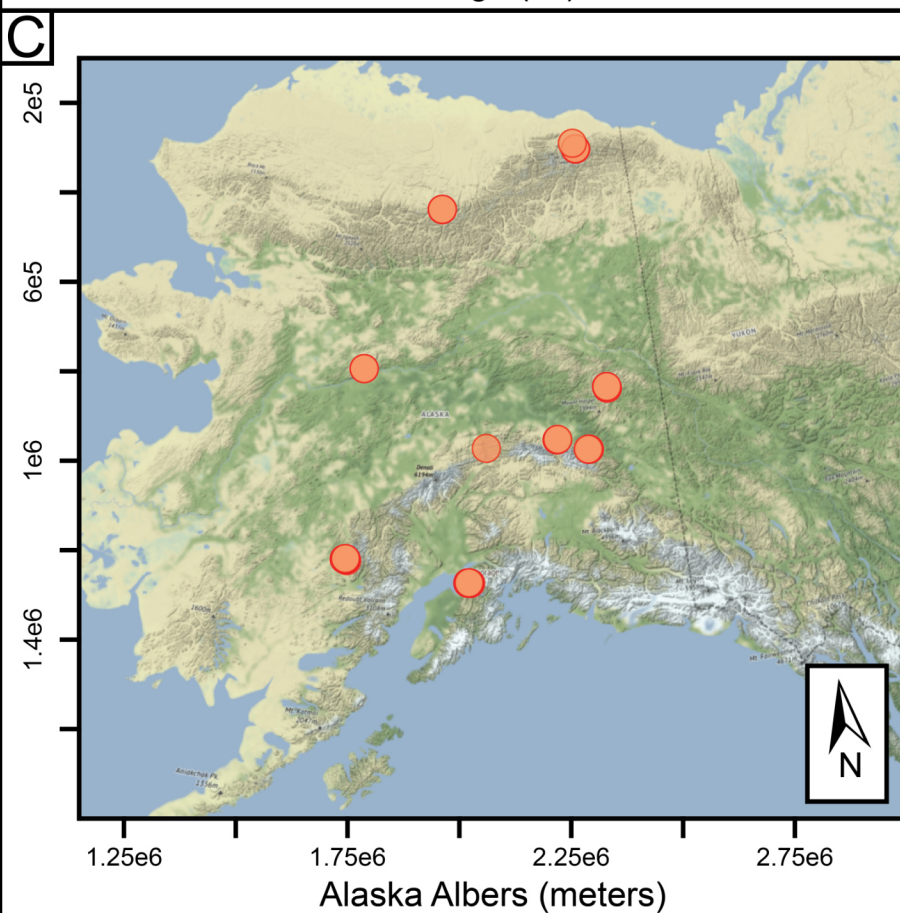

Supplement: Supplementary file 1 [file cp-2023-20-supplement-version2.zip]

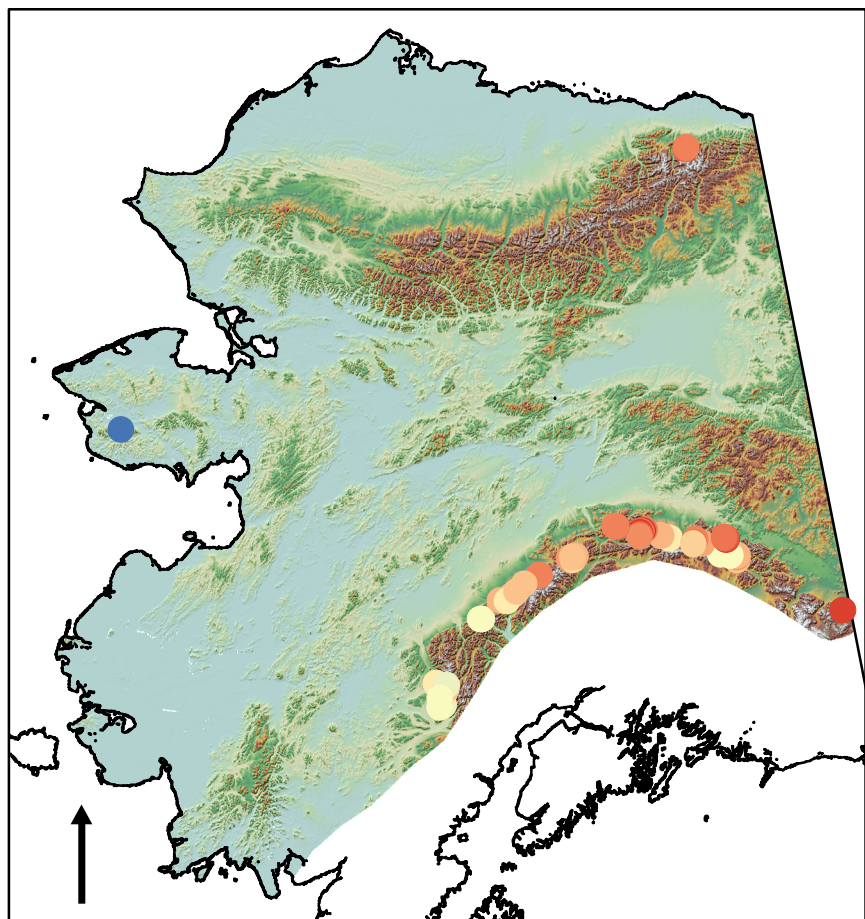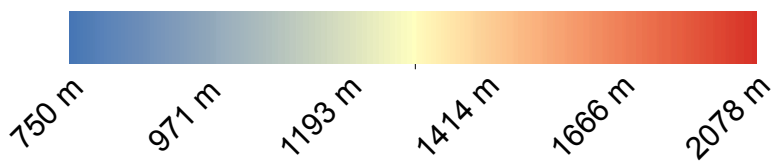

Supplement: Supplementary file 2 [file cp-2023-20-supplement-version2.zip]

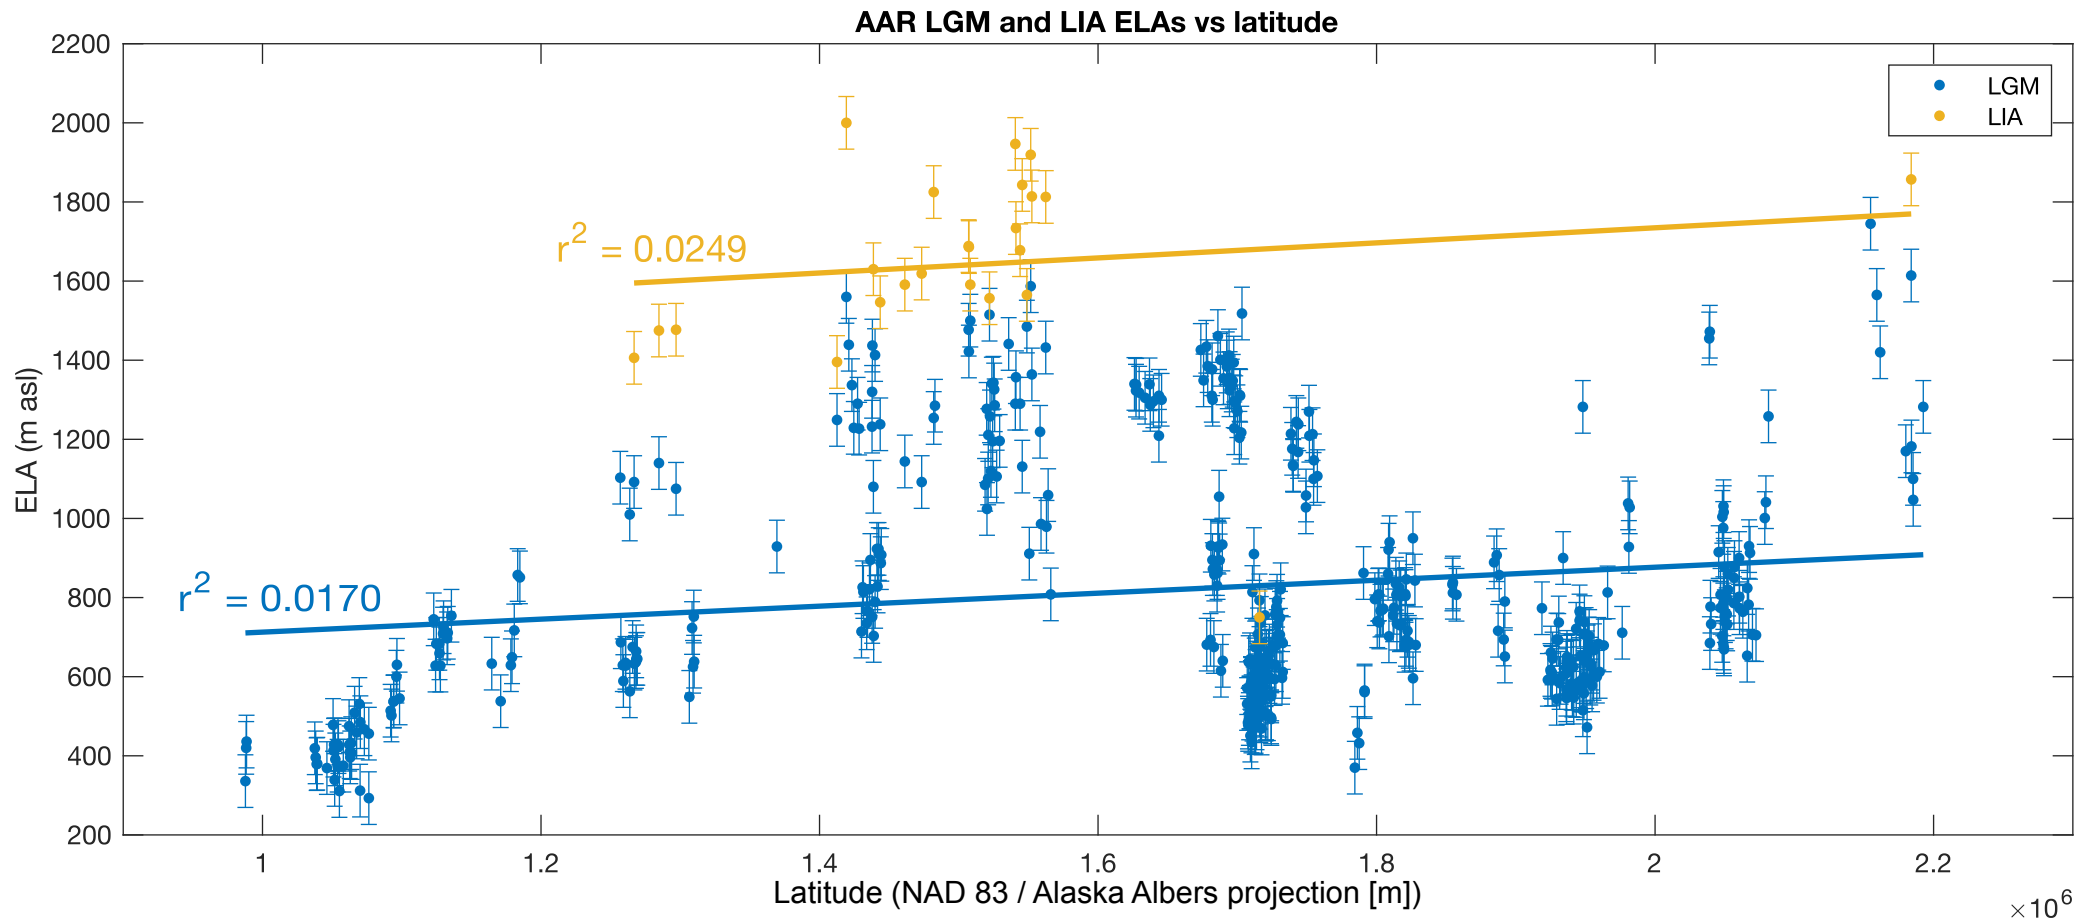

Supplement: Supplementary file 3 [file cp-2023-20-supplement.zip]

AAR  $\Delta$ ELAs vs longitude

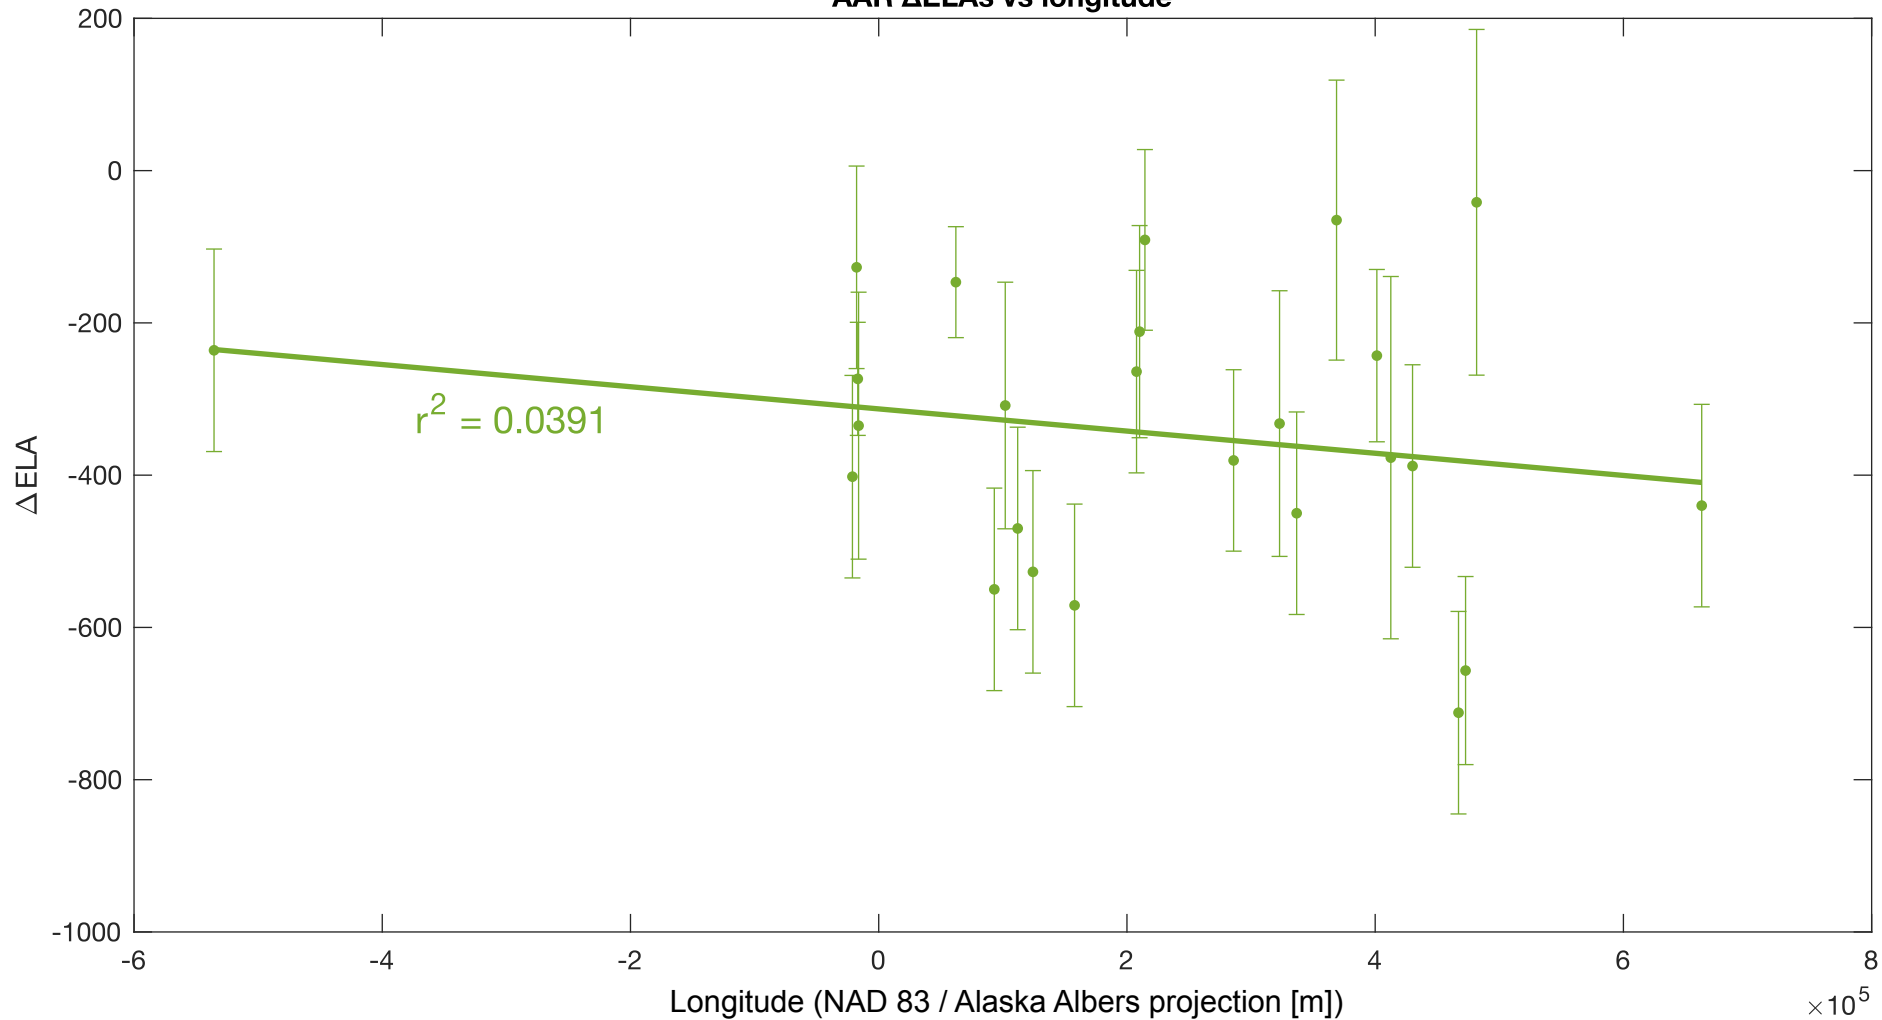

Supplement: Supplementary file 4 [file cp-2023-20-supplement.zip]

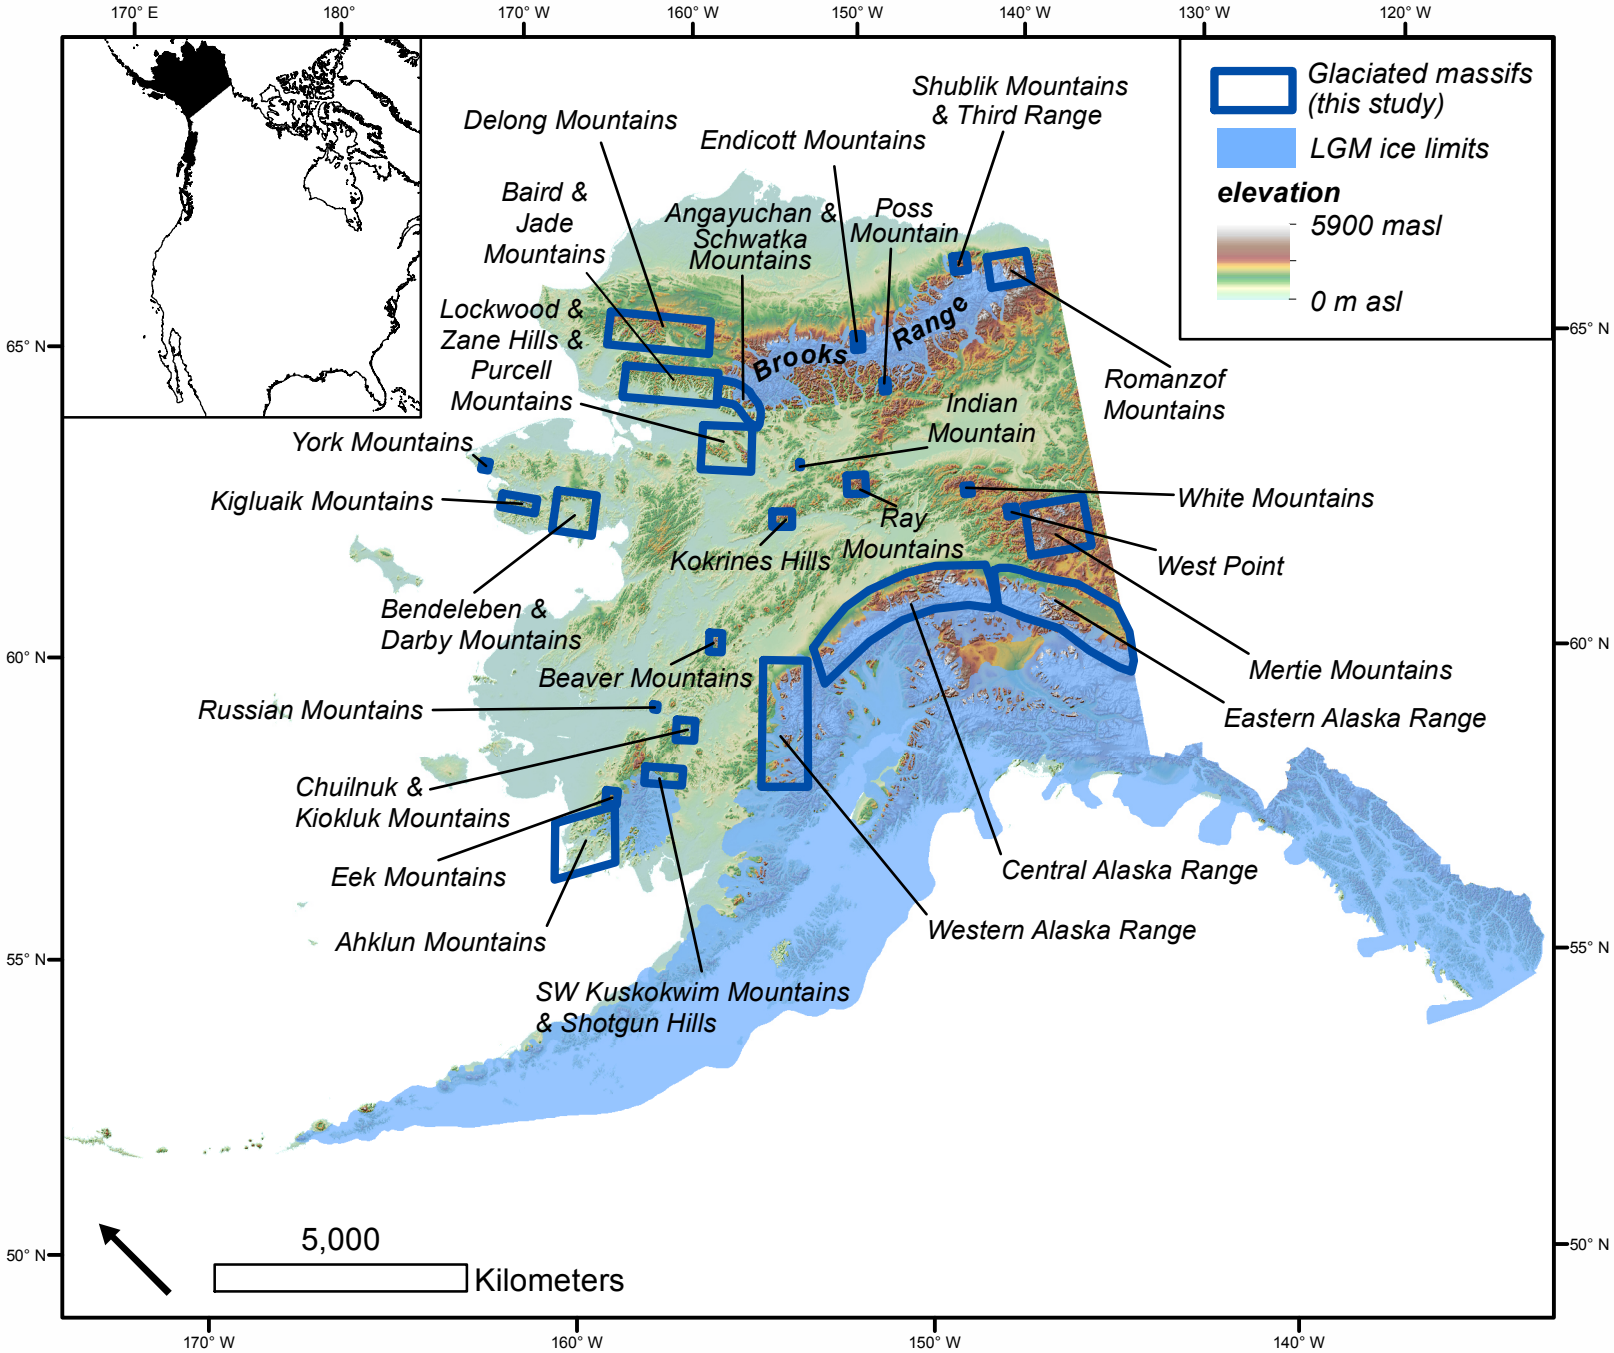

Supplement: Supplementary file 5 [file cp-2023-20-supplement.zip]

AAR  $\Delta$ ELAs vs latitude

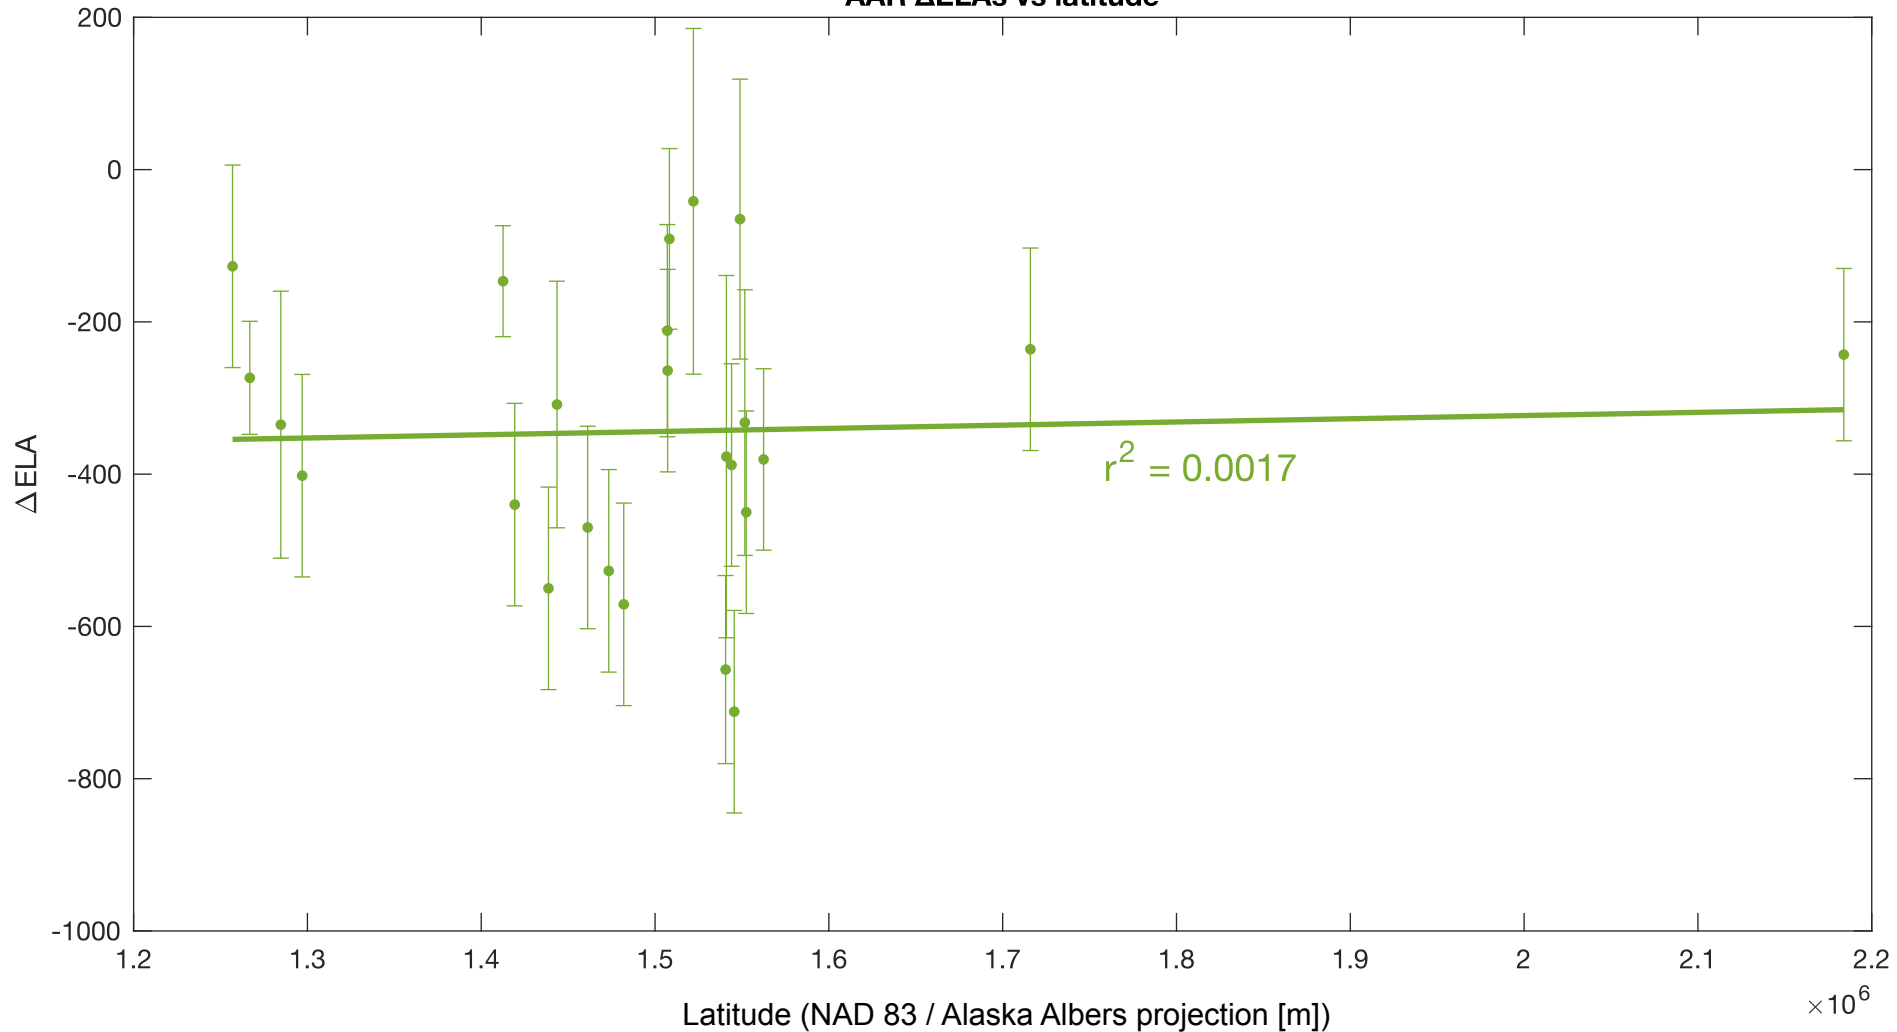

Supplement: Supplementary file 7 [file cp-2023-20-supplement.zip]
